# Supplementary material for: Prognostic Signature of Osteosarcoma Based on 14 Autophagy-Related Genes
Source: PubMed Central journal article supplement (PMC8322075; doi:10.3389/pore.2021.1609782), 2021-07-16

Schoenfeld Individual Test p: 0.0597

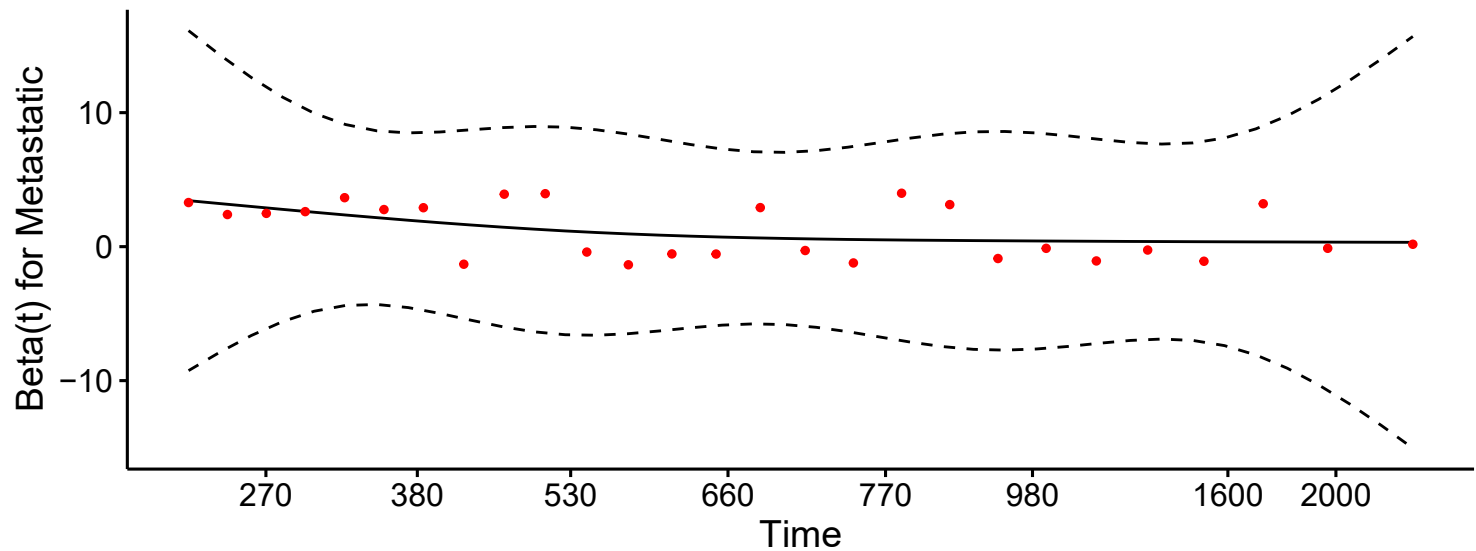

Schoenfeld Individual Test p: 0.1794

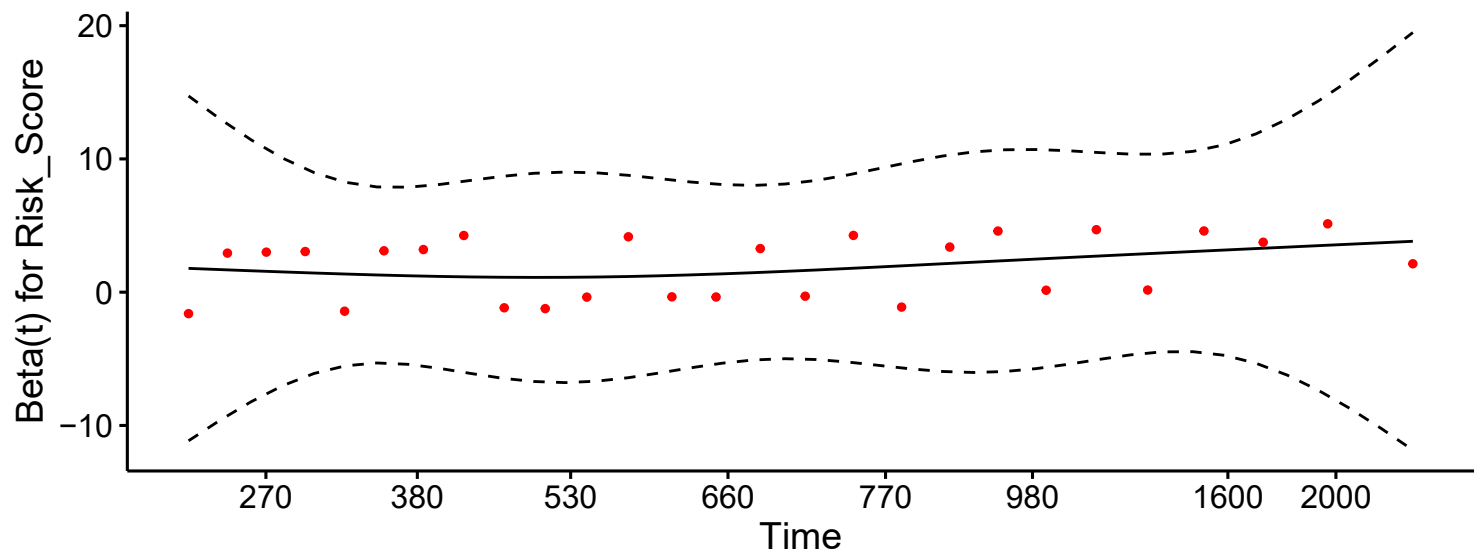

Supplement: Image1.pdf [file Image1.pdf]
